# Supplementary material
Source: publisher figshare collection journal article supplement (https://acs.figshare.com/ndownloader/files/4668610)
Supplement: Supplementary file 1 [file 4668610]

## Supporting Information

### Ligand Migration and Binding in the Dimeric Hemoglobin of *Scapharca inaequalis*

**Karin Nienhaus<sup>‡</sup>, James E. Knapp<sup>§||</sup>, Pasquale Palladino<sup>‡</sup>,  
William E. Royer, Jr.<sup>§</sup>, G. Ulrich Nienhaus<sup>‡,⊥,\*</sup>**

<sup>†</sup>G.U.N. was supported by the Deutsche Forschungsgemeinschaft (grant Ni 291/3) and the Fonds der Chemischen Industrie. W.E.R. was supported by the National Institutes of Health (grants DK43323 and GM66756).

<sup>‡</sup>Institute of Biophysics  
University of Ulm  
89069 Ulm, Germany,

<sup>§</sup>Department of Biochemistry and Molecular Pharmacology  
University of Massachusetts Medical School  
364 Plantation St., LRB 921  
Worcester, MA 01605, USA,

<sup>⊥</sup>Department of Physics  
University of Illinois at Urbana-Champaign  
1110 West Green Street,  
Urbana, IL 61801, USA

<sup>||</sup>Current Address:  
Department of Biochemistry and Molecular Biology  
University of Texas, Medical Branch at Galveston  
301 University Blvd  
Galveston, TX 77551-1055.

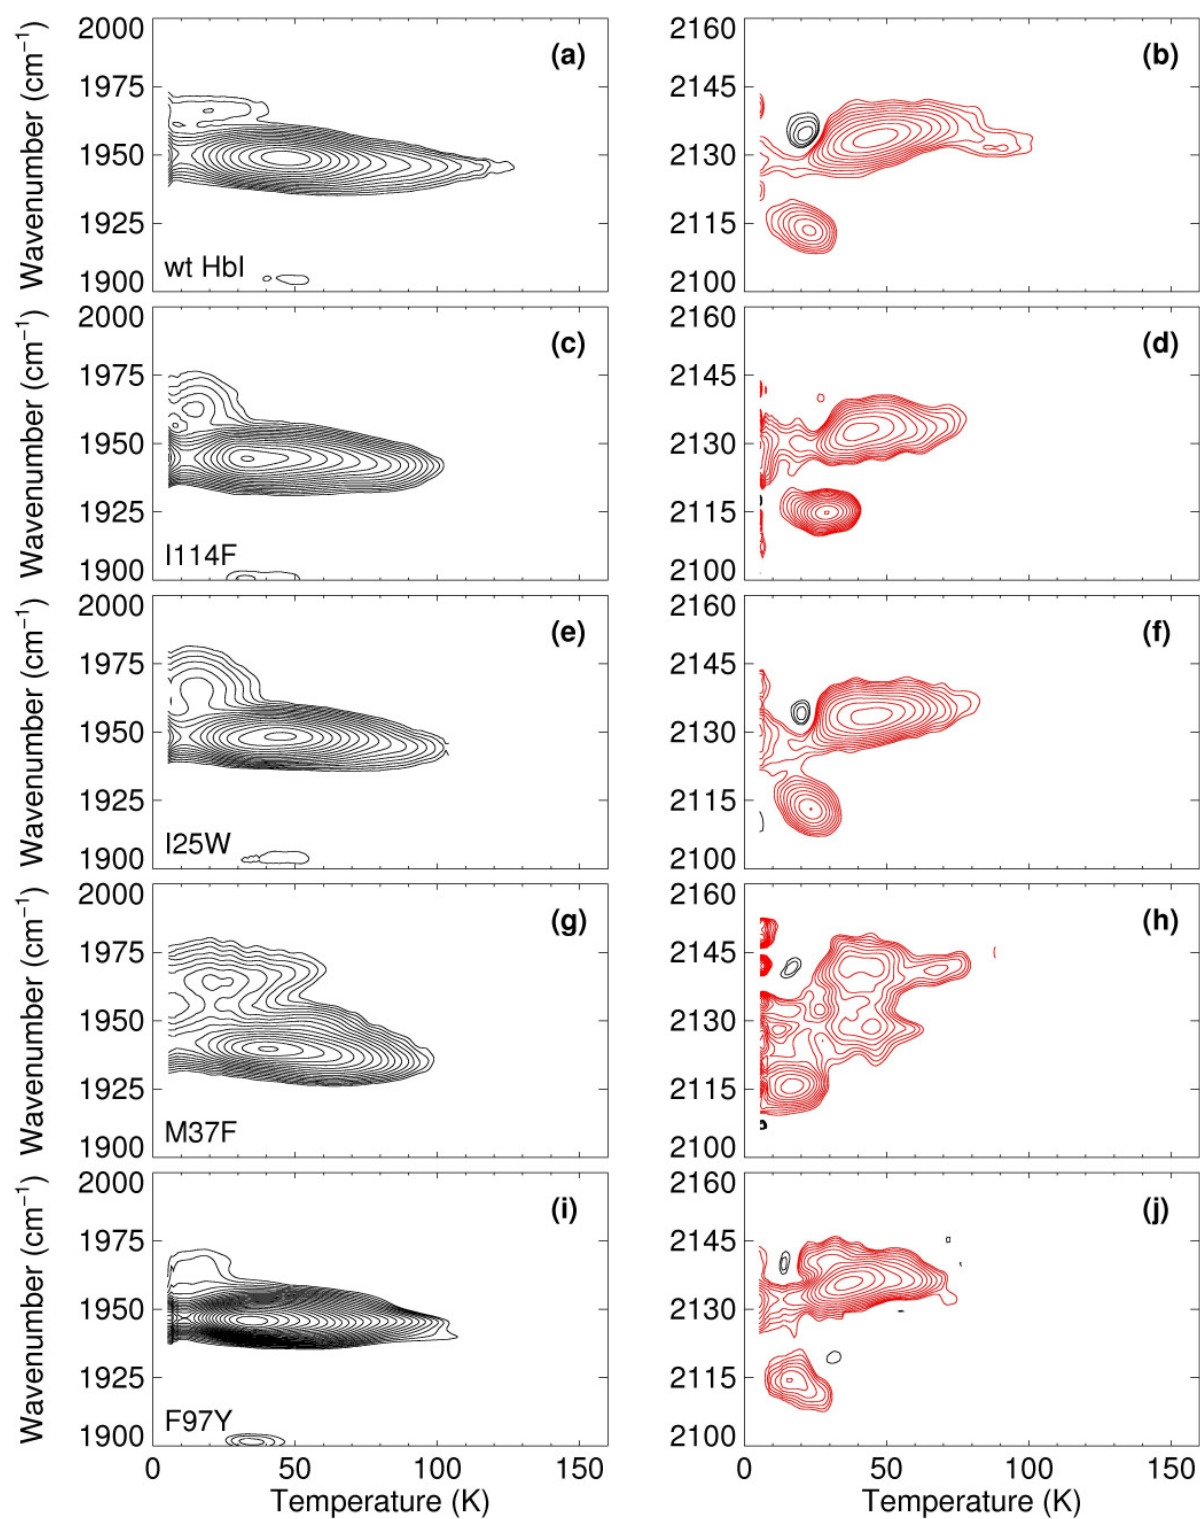

Supporting Figure 1: TDS contour maps of wild-type and mutant HbICO samples. Data were taken after 1-s illumination at 4 K. Left column: Absorption changes in the bands of heme-bound CO. Right column: Absorption changes in the photoproduct bands. Contours are spaced logarithmically; black and red lines represent increasing and decreasing absorption, respectively.

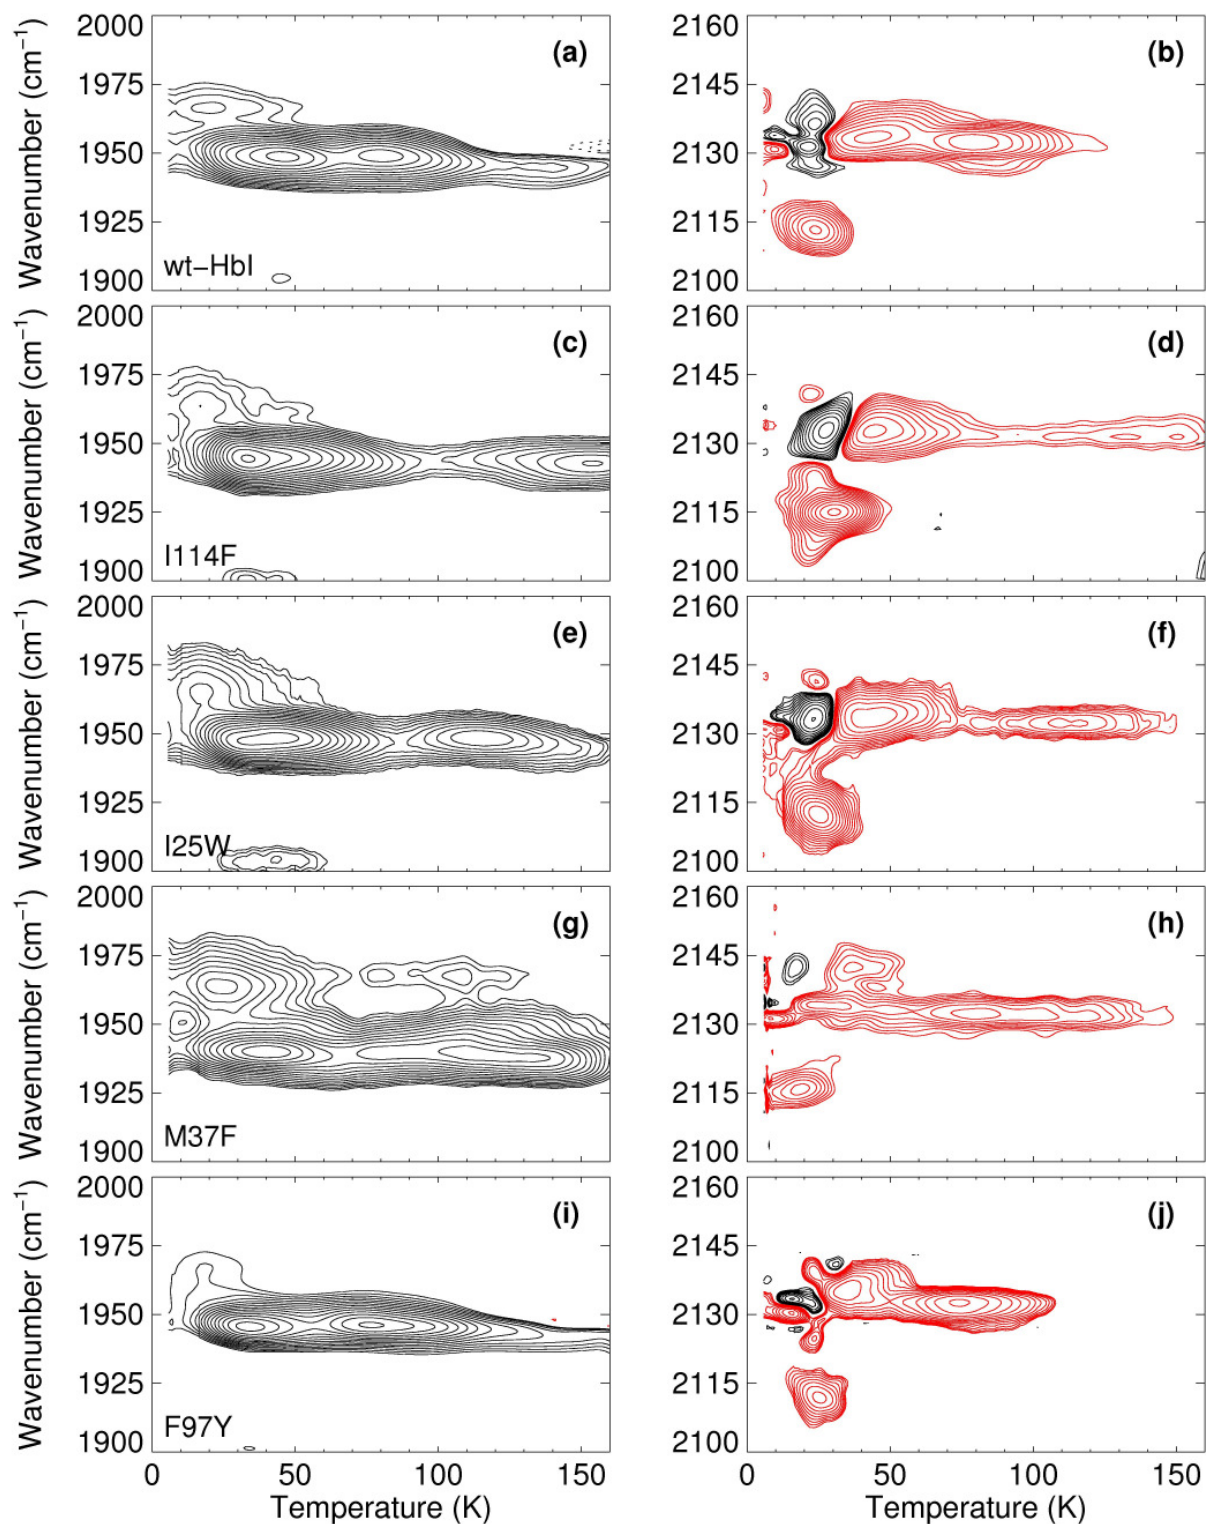

Supporting Figure 2: TDS contour maps of wild-type and mutant HbICO samples. Data were taken after slow cooling from 160 to 4 K under continuous illumination. Left column: Absorption changes in the bands of heme-bound CO. Right column: Absorption changes in the photoproduct bands. Contours are spaced logarithmically; black and red lines represent increasing and decreasing absorption, respectively.

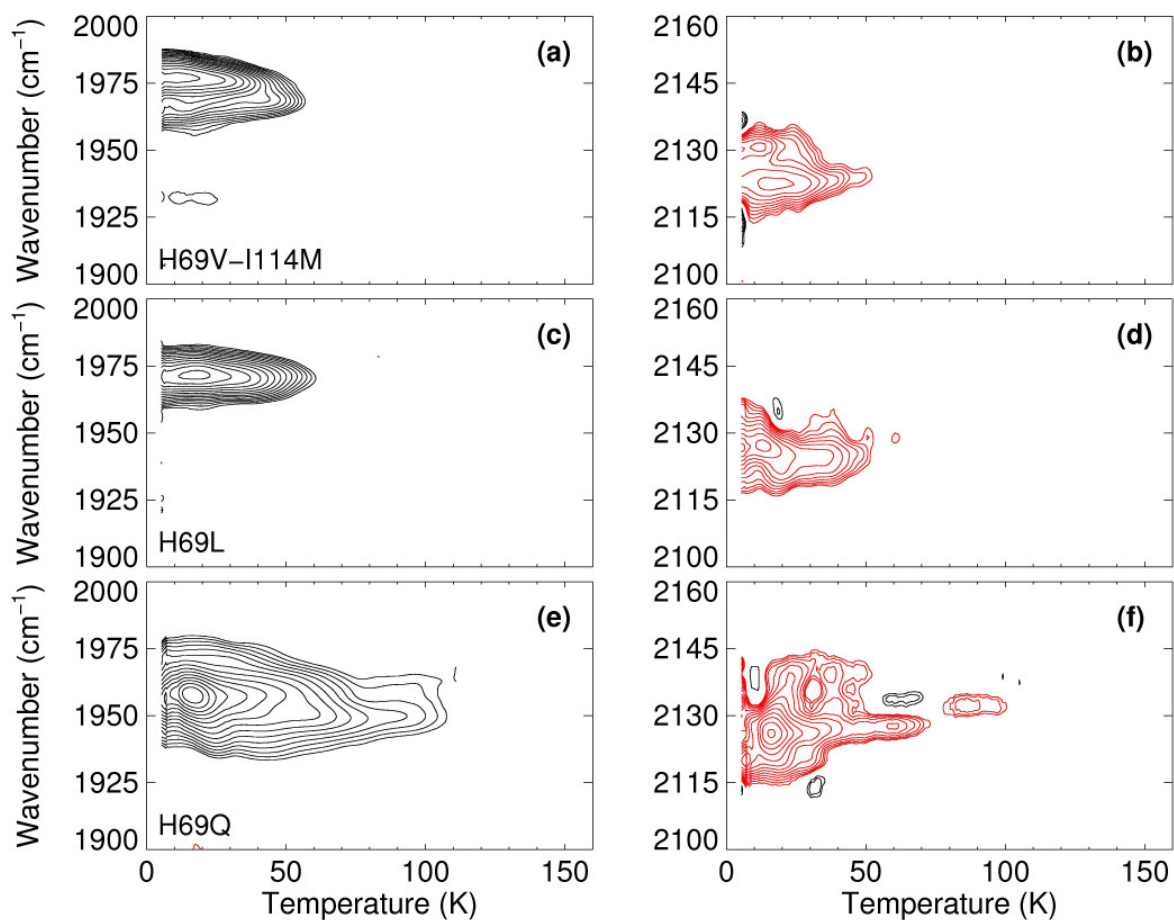

Supporting Figure 3: TDS contour maps of mutant HbICO samples. Data were taken after 1-s illumination at 4 K. Left column: Absorption changes in the bands of heme-bound CO. Right column: Absorption changes in the photoproduct bands. Contours are spaced logarithmically; black and red lines represent increasing and decreasing absorption, respectively.

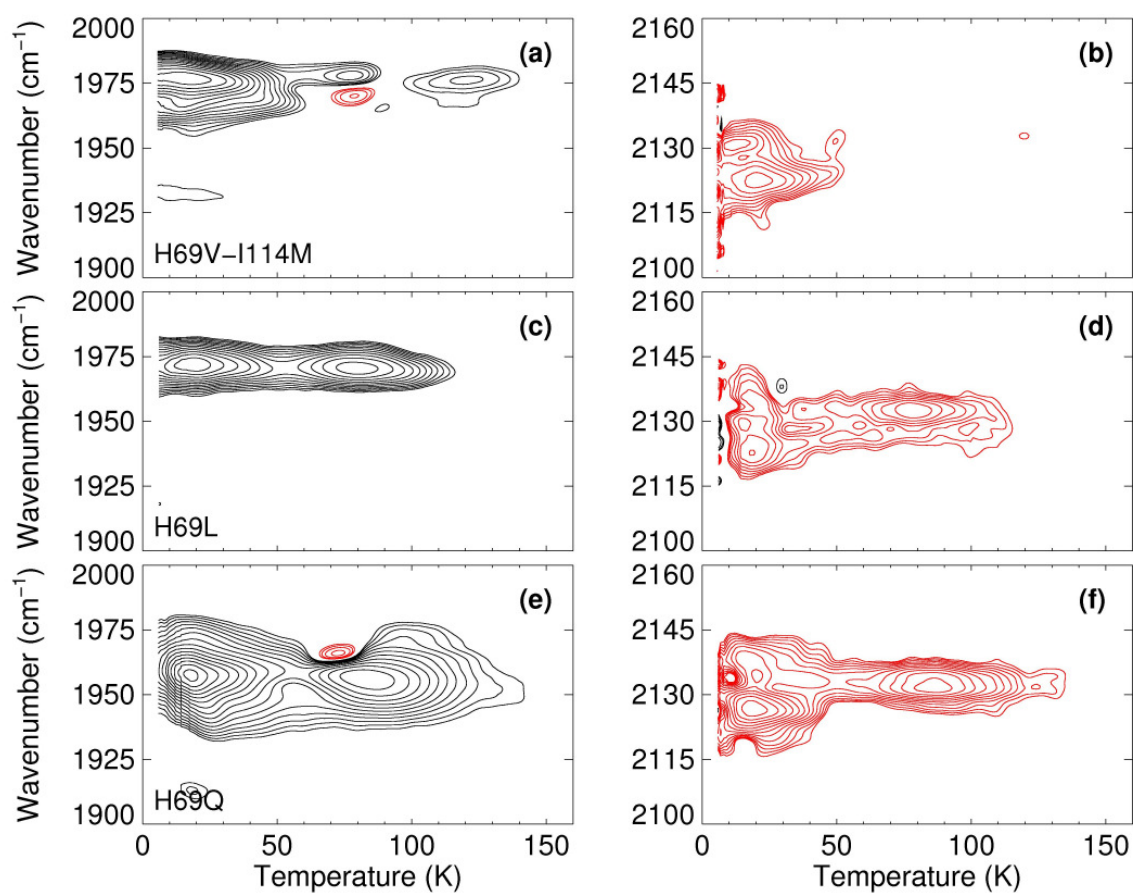

Supporting Figure 4: TDS contour maps of mutant HbICO samples. Data were taken after slow cooling from 160 to 4 K under continuous illumination. Left column: Absorption changes in the bands of heme-bound CO. Right column: Absorption changes in the photoproduct bands. Contours are spaced logarithmically; black and red lines represent increasing and decreasing absorption, respectively.
